# Supplementary material for: A Simple Repeat Polymorphism in the MITF-M Promoter Is a Key Regulator of White Spotting in Dogs
Source: PubMed Central journal article supplement (PMC4130573; doi:10.1371/journal.pone.0104363), 2014-08-12
Supplement: pone.0104363.s002.pdf [file pone.0104363.s002.pdf]

Table S1. Description of wolf samples and their genotype at *MITF* SINE, exon 1B Length polymorphism (Lp) and SNP#21 and estimated copy number at the *AMY2B* locus.

| ID   | Origin      | SINE | Exon 1B | Lp           | SNP#21 | AMY2B |
|------|-------------|------|---------|--------------|--------|-------|
| SW20 | Scandinavia | +/+  | 88/88   | C11A10G2A12  | G/G    | 1.91  |
| SW15 | Scandinavia | +/+  | 100/88  | C11A7G2A12   | G/G    | 1.91  |
| SW3  | Scandinavia | +/+  | 100/88  | C11A10G2A12  | G/G    | 2.04  |
| SW27 | Scandinavia | +/+  | 100/88  | C10A7G2A11   | G/G    | 2.04  |
| SW25 | Scandinavia | +/+  | 100/88  |              | G/G    |       |
| SW16 | Scandinavia | -/-  | 100/100 | C7ACA10G2A13 | G/G    | 1.85  |
| SW10 | Scandinavia | -/-  | 100/100 | C7ACA10G2A13 | G/G    |       |
| SW9  | Scandinavia | -/-  | 100/100 | C7ACA10G2A14 | G/G    | 1.81  |
| SW11 | Scandinavia | -/-  | 100/100 | C7ACA10G2A13 | G/G    | 1.98  |
| SW18 | Scandinavia | -/-  | 100/100 | C7ACA9G2A13  | G/G    | 2.01  |
| SW30 | Scandinavia | -/+  | 100/100 |              | G/G    |       |
| SW32 | Scandinavia | -/+  | 100/100 |              | G/G    |       |
| SW1  | Scandinavia | -/-  | 100/100 |              | G/G    |       |
| SW2  | Scandinavia | -    | 100/88  |              | G/G    |       |
| SW4  | Scandinavia | -/+  | 100/88  |              | G/G    |       |
| SW5  | Scandinavia | -/+  | 100/88  |              | G/G    |       |
| SW6  | Scandinavia | -/+  | 100/100 |              | G/G    |       |
| SW7  | Scandinavia | -/+  | 100/88  |              | G/G    |       |
| SW8  | Scandinavia | -    | 100/100 |              | G/G    |       |
| SW12 | Scandinavia | -/+  | 100/100 |              | G/G    |       |
| SW13 | Scandinavia | -/-  | 100/100 |              | G/G    |       |
| SW14 | Scandinavia | -/+  | 100/100 |              | G/G    |       |
| SW17 | Scandinavia | -/-  | 100/100 |              | G/G    |       |
| SW19 | Scandinavia | -/-  | 100/100 |              | G/G    |       |
| SW21 | Scandinavia | -/-  | 100/100 |              | G/G    |       |
| SW22 | Scandinavia | -/-  | 100/100 |              | G/G    |       |
| SW23 | Scandinavia | -/+  | 100/88  |              | G/G    |       |
| SW24 | Scandinavia | -/-  | 100/100 |              | G/G    |       |
| SW26 | Scandinavia | -/+  | 100/88  |              | G/G    |       |
| SW28 | Scandinavia | -/-  | 100/100 |              | G/G    |       |
| SW29 | Scandinavia | -/-  | 100/100 |              | G/G    |       |
| SW31 | Scandinavia | -    | -       |              | G/G    |       |
| SW33 | Scandinavia | -/+  | 100/100 |              | G/G    |       |
| SW34 | Scandinavia | -/+  | 100/88  |              | G/G    |       |
| SW35 | Scandinavia | -/-  | 100/100 |              | G/G    |       |
| SW36 | Scandinavia | -/-  | 100/100 |              | G/G    |       |
| SW37 | Scandinavia | -/-  | 100/100 |              | G/G    |       |

|           |          |     |         |                         |     |      |
|-----------|----------|-----|---------|-------------------------|-----|------|
| 2W, 22799 | Belarus  | -/- | 100/100 | C7ACA9G2A11/C10A8G2A12  | G/G | 1.78 |
| 3W, 22800 | Belarus  | +/+ | 100/100 | C11A7G2A12              | G/G | 2.06 |
| 4W, 22802 | Russia   | -/+ | 100/100 |                         | G/G |      |
| 5W, 22803 | Russia   | -/- | 100/100 |                         | G/G |      |
| 6W, 22804 | Bulgaria | -/+ | 100/100 |                         | G/G |      |
| 7W, 22807 | Spain    | -/- | 100/100 | C7ACA9G2A12/C12A8G2A12  | G/G | 2.09 |
| 8W, 22809 | Spain    | -/- | 100/100 | C7ACA9G2A12/C11A8G2A11  | G/G | 2.02 |
| 13        | Belarus  | -/- | 100/100 | C7ACA9G2A12/C14A8G2A11  | G/G | 1.81 |
| 104       | Belarus  | +/+ | 100/100 |                         | G/G |      |
| 460       | Russia   | -/- | 100/100 |                         | G/G |      |
| 520       | Russia   | -/+ | 100/100 |                         | G/G |      |
| 523       | Russia   | -/- | 100/100 |                         | G/G |      |
| 719       | Bulgaria | -/+ | 100/100 |                         | G/G |      |
| JAT1      | Spain    | -/- | 100/100 | C7ACA9G2A12/C12A8G2A12  | G/G | 2.34 |
| CVA426    | Spain    | -/- | 100/100 |                         | G/G |      |
| A34       | Spain    | -/+ | 100/100 |                         | G/A | 1.94 |
| A39       | Spain    | -/- | 100/100 |                         | G/G |      |
| WCA1      | Canada   | -/+ | 100/100 | C6AC3A8G2A12/C12A9G2A12 | G/A | 1.99 |
| WCA2      | Canada   | -/- | 100/100 |                         | G/G |      |
| WCA3      | Canada   | -/- | 100/100 |                         | G/G |      |
| WCA4      | Canada   | -/- | 100/100 |                         | G/G |      |
| WCA5      | Canada   | -/- | 100/100 |                         | G/G |      |
| WCA6      | Canada   | -/+ | 100/100 |                         | G/G |      |
| WCA7      | Canada   | -/+ | 100/100 |                         | G/A | 2.04 |
| W36       | Italy    | +/+ | 100/100 |                         | G/G |      |
| 8         | China    | -/+ | ?       |                         | G/G |      |
| 9         | China    | -/- | ?       |                         | G/G |      |
| WUSA1     | USA      | -/+ | ?       | C7ACA10G2A13/C12A7G2A12 |     |      |
| Jordan    | Jordan   | -/+ | ?       |                         |     |      |
