# Supplementary material for: A Simple Repeat Polymorphism in the MITF-M Promoter Is a Key Regulator of White Spotting in Dogs
Source: PubMed Central journal article supplement (PMC4130573; doi:10.1371/journal.pone.0104363), 2014-08-12
Supplement: pone.0104363.s003.pdf [file pone.0104363.s003.pdf]

Table S2. Frequency of the A allele at the *MITF* SNP#21 associated with white spotting in dogs

| Breed                    | Colour (genotype) <sup>1</sup> | n  | pA   |
|--------------------------|--------------------------------|----|------|
| Beagle                   | Piebald ( $s^p/s^p$ )          | 15 | 0.80 |
| Bearded collie           | Irish ( $s^i/s^i$ )            | 15 | 0    |
| Border collie            | Irish ( $s^i/s^i$ )            | 15 | 0.17 |
| Boxer                    | White ( $s^w/s^w$ )            | 5  | 1.00 |
|                          | Flash (S/ $s^w$ )              | 1  | 0.5  |
|                          | Solid (S/S)                    | 5  | 0    |
| Bull terrier             | White ( $s^w/s^w$ )            | 6  | 1.00 |
| English springer spaniel | Piebald ( $s^p/s^p$ )          | 13 | 0.92 |
| Giant schnauzer          | Solid (S/S)                    | 15 | 0.03 |
| Great Dane               | Solid (S/S)                    | 3  | 0    |
| Hovawart                 | Solid (S/S)                    | 16 | 0.03 |
| Irish wolfhound          | Solid (S/S)                    | 16 | 1.00 |
| Labrador                 | Solid (S/S)                    | 8  | 0.06 |
| Leonberger               | Solid (S/S)                    | 8  | 0    |
| Newfoundland             | Solid (S/S)                    | 14 | 0.43 |
| Polish lowland           | Piebald ( $s^p/s^p$ )          | 8  | 0.81 |
| Shar pei                 | Solid (S/S)                    | 14 | 0.71 |
| Swedish elkhound         | Solid (S/S)                    | 13 | 0.19 |
| Welsh springer spaniel   | Piebald ( $s^p/s^p$ )          | 16 | 0.94 |

<sup>1</sup>The indicated colour and expected genotypes are based on the most common colour pattern in each breed except for those breeds (Boxer and Bull terrier) that are segregating for colour; the indicated colour for Boxers and Bull terriers are based on individual records.
