# Supplementary material for: A Simple Repeat Polymorphism in the MITF-M Promoter Is a Key Regulator of White Spotting in Dogs
Source: PubMed Central journal article supplement (PMC4130573; doi:10.1371/journal.pone.0104363), 2014-08-12
Supplement: pone.0104363.s004.pdf [file pone.0104363.s004.pdf]

Table S3. Primers and probes used for the characterization of the canine *MITF* locus.

| <b>Name</b>                             | <b>Primer sequence 5'-3'</b>               |
|-----------------------------------------|--------------------------------------------|
| <b>Luciferase Construct PCR primers</b> |                                            |
| SineF_NheI                              | GCGTCGACGCTAGCTGAAATTGATGGAAAATAACCTG      |
| SineR_Bgl2                              | GTCGACGCAGATCTCTCGGGGCTCTCTGACTTT          |
| LpF_Bgl2                                | GCGTCGACAGATCTATACATTTCACTCTGATTACC        |
| LpR_Hind3                               | GTCGACGCAAGCTTTATTCCTCTCTCTACTTTCTG        |
| F_PromMITF_1_Bgl2                       | GCGTCGACAGATCTTCTTCTCCAAAGGGGCAGC          |
| F_PromMITF_2_Bgl2                       | GCGTCGACAGATCTGCTCATCACTTAAAAAGATT         |
| F_PromMITF_3_Bgl2                       | GCGTCGACAGATCTTGAAGACCAAGCTCGTAGGA         |
| R_PromMITF_Hind3                        | GTCGACGCAAGCTTTCCAATGAGAAACGGTAGAC         |
| <b>Mutagenesis oligos</b>               |                                            |
| Mutagen_S_F                             | ATTTATTTTTTAAATGTGTAGCCCTTTCTTTTTTAAAGTGTA |
| Mutagen_S_R                             | TACACTTAAAAAAGAAAGGGCTACACATTTAAAAATAAAT   |
| <b>Sequencing primers</b>               |                                            |
| SINE_seq_Fprimer                        | GTTCTCATTTATATGCTTGC                       |
| SINE_seq_Rprimer                        | GTAAGACCCTAAACCCTTT                        |
| Lp_seq_Fprimer                          | GTGAGTTTGACTTTGATAGC                       |
| Lp_seq_Rprimer                          | AGACTGACTGGCATAGAGA                        |
| RV3F (RVprimer3)                        | CTAGCAAATAGGCTGTCCC                        |
| GL2R (GLprimer2)                        | CTTTATGTTTTTGCGCTTCCA                      |
| Fwd_con_mitf1                           | CAGGATCTGAATGAAGAAAG                       |
| Fwd_con_mitf2                           | TCACAATATGGCTGTGAG                         |
| Fwd_con_mitf5                           | TGCTTAAGATAGCTCACCA                        |
| Fwd_con_mitf6                           | TCATGTGTAATAGTAGCTTTTAGG                   |
| Rev_con_mitf1                           | AGTGCTTGAGTATTATTACCAC                     |
| Rev_con_mitf3                           | AGGAGGTGGAACGTCTCTA                        |
| Rev_con_mitf4                           | TTACTCATTTACTTGTTCCATTA                    |
| Rev_con_mitf5                           | AGTGATGAGCTATCAAAGTCA                      |
| <b>Fragment analysis primers</b>        |                                            |
| MITF_LpFR_F                             | TGAAGACCAAGCTCGTAGGAC                      |
| MITF_LpFR_R_FAM                         | FAM - GACTGGCATAGAGAAGGCACT                |
| <b>SINE insertion primers</b>           |                                            |
| SINE_MITF_F                             | TGGGTGGTTAGTTTGAAGGTC                      |
| SINE_middle_F                           | CCCTCTGCCTATGTCTCTGC                       |
| SINE_MITF_R                             | CCCCATCTTAGCCATGCTATT                      |
| <b>Exon 1B primers</b>                  |                                            |
| 1B_F                                    | AGGATGCTCCTCGGAACTG                        |
| 1B_R                                    | CTCCGAAATGCAAACGAAAG                       |

SNP#21 TaqMan Genotyping  
Assay

---

|                |                                |
|----------------|--------------------------------|
| F              | GGGCAATGGGTGTAATGTGTTTATTT     |
| R              | AAAGAATAAGGATCTGCCAGTGAATTAACA |
| Probe_allele_G | VIC-TTTAAATGTGTAGCCCTTTC-NFQ   |
| Probe_allele_A | FAM-TTTTAAATGTGTAACCCTTTC-NFQ  |
